# Supplementary material for: Dimeric and high-resolution structures of Chlamydomonas Photosystem I from a temperature-sensitive Photosystem II mutant
Source: PubMed Central journal article supplement (PMC8660910; doi:10.1038/s42003-021-02911-7), 2021-12-09
Supplement: 42003_2021_2911_MOESM1_ESM.pdf [file 42003_2021_2911_MOESM1_ESM.pdf]

1 **Supplementary Information**

2 **Dimeric and high-resolution structures of Chlamydomonas**

3 **Photosystem I from a temperature-sensitive Photosystem II mutant**

4  
5 *Ido Caspy<sup>1\*</sup>, Tom Schwartz<sup>1\*</sup>, Vinzenz Bayro-Kaiser<sup>1</sup>, Mariia Fadeeva<sup>1</sup>, Amit Kessel<sup>1</sup>,*  
6 *Nir Ben-Tal<sup>1</sup>, and Nathan Nelson<sup>1\*\*</sup>*

7  
8 *<sup>1</sup>Department of Biochemistry and Molecular Biology,*  
9 *The George S. Wise Faculty of Life Sciences, Tel Aviv University, Tel Aviv, 69978, Israel*

10  
11 *\*Equally contributed to the experimental work presented.*

12  
13 *\*\*Corresponding author: [nelson@tauex.tau.ac.il](mailto:nelson@tauex.tau.ac.il)*

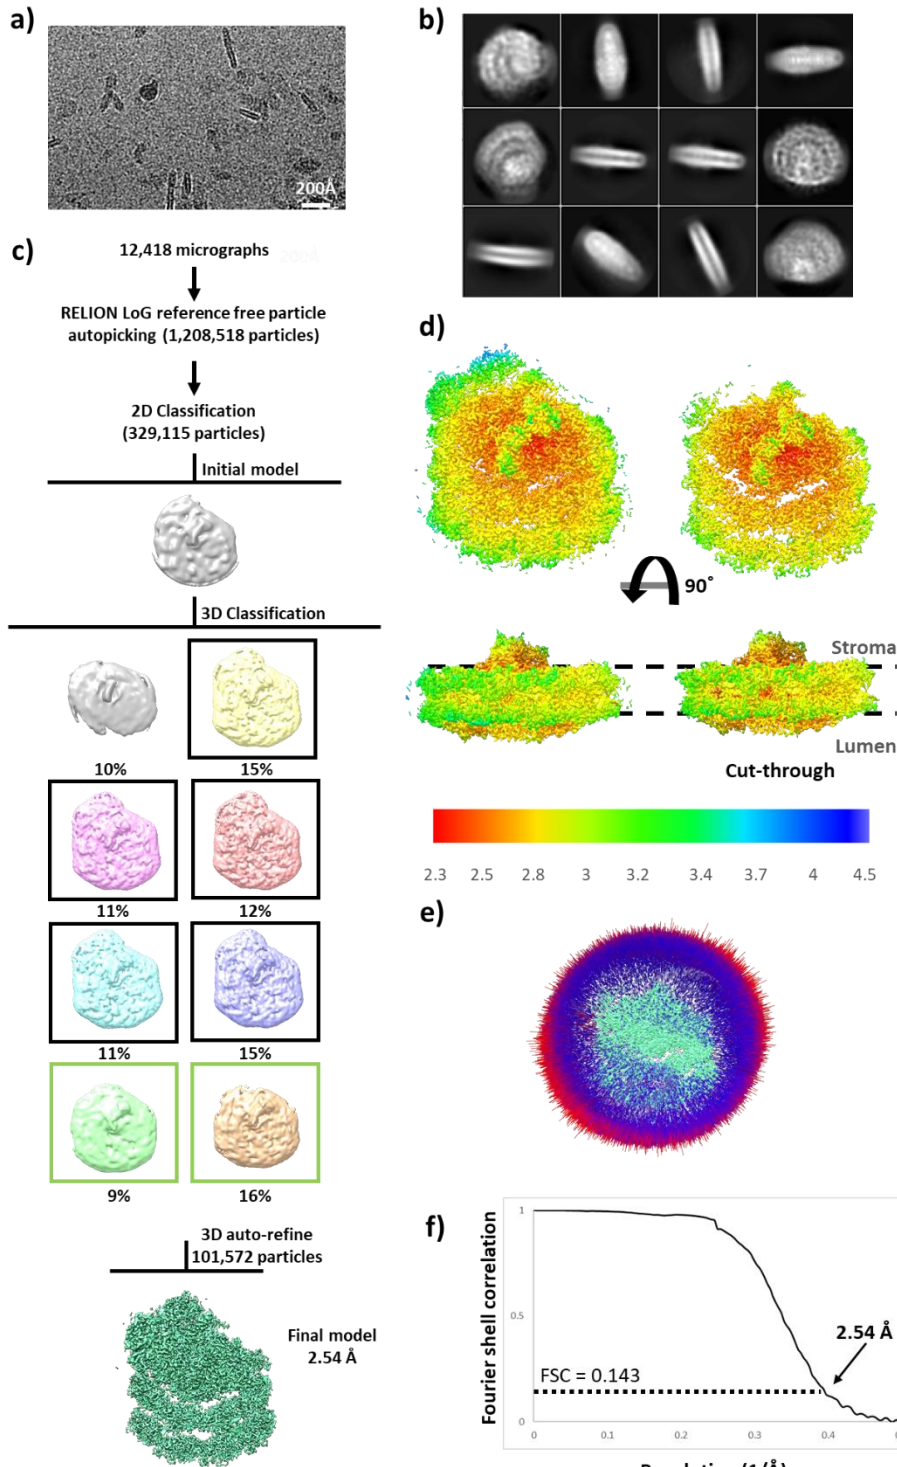

22

23

24 **Supplementary Figure 1.** Cryo-EM data collection and processing of TSP4-10LHC. a) A zoomed-in  
 25 view on a TSP4 micrograph. Scale bar size is 200 Å. b) Representing class averages after 2D  
 26 classification. c) Cryo-EM data processing workflow. d) Local resolution of TSP4-10LHC (left) and cut-  
 27 through map (right). e) Angular distribution of TSP4-10LHC. f) Fourier shell correlation (FSC) RELION  
 28 postprocessing result marks a 2.54 Å resolution based on the 0.143 gold standard.

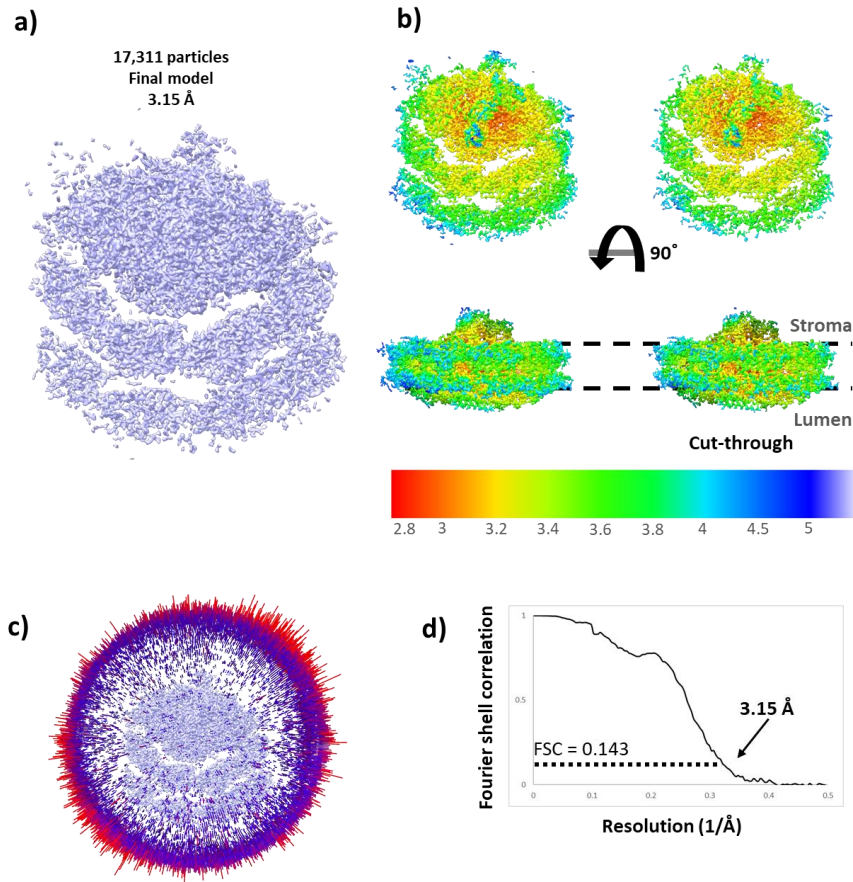

29  
30

31 **Supplementary Figure 2.** Cryo-EM data collection and processing of TSP4-8LHC. a) The TSP4-  
32 8LHC final map after sharpening. b) Local resolution of TSP4-8LHC (left) and cut-through map (right).  
33 c) Angular distribution of TSP4-8LHC. d) Fourier shell correlation (FSC) RELION postprocessing result  
34 marks a 3.15 Å resolution based on the 0.143 gold standard.  
35

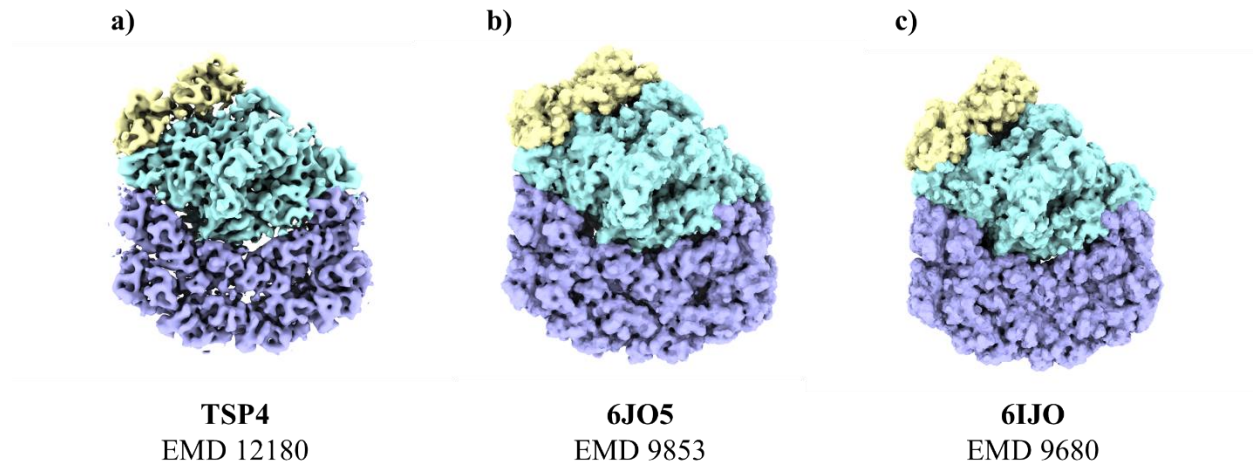

36  
37

38 **Supplementary Figure 3.** The map quality of TSP4-10LHC when compared to the previous *C.*  
39 *reinhardtii* PSI. a) 2.54 Å TSP4-10LHC (PDBID 7BGI; EMD 12180). b) 2.90 Å *C. reinhardtii* PSI<sup>19</sup>  
40 (PDBIB 6JO5; EMD 9853). c) 3.30 Å *C. reinhardtii* PSI<sup>18</sup> (PDBIB 6IJO; EMD 9680). All of the maps  
41 were low-pass filtered to 6 Å, with gaussian filtered in Chimera<sup>62</sup>, and placed at a contour of 0.0045. The  
42 core complex is coloured in cyan, the LHC belts in blue, and the Lhca2-Lhca9 dimer in yellow.

43  
44

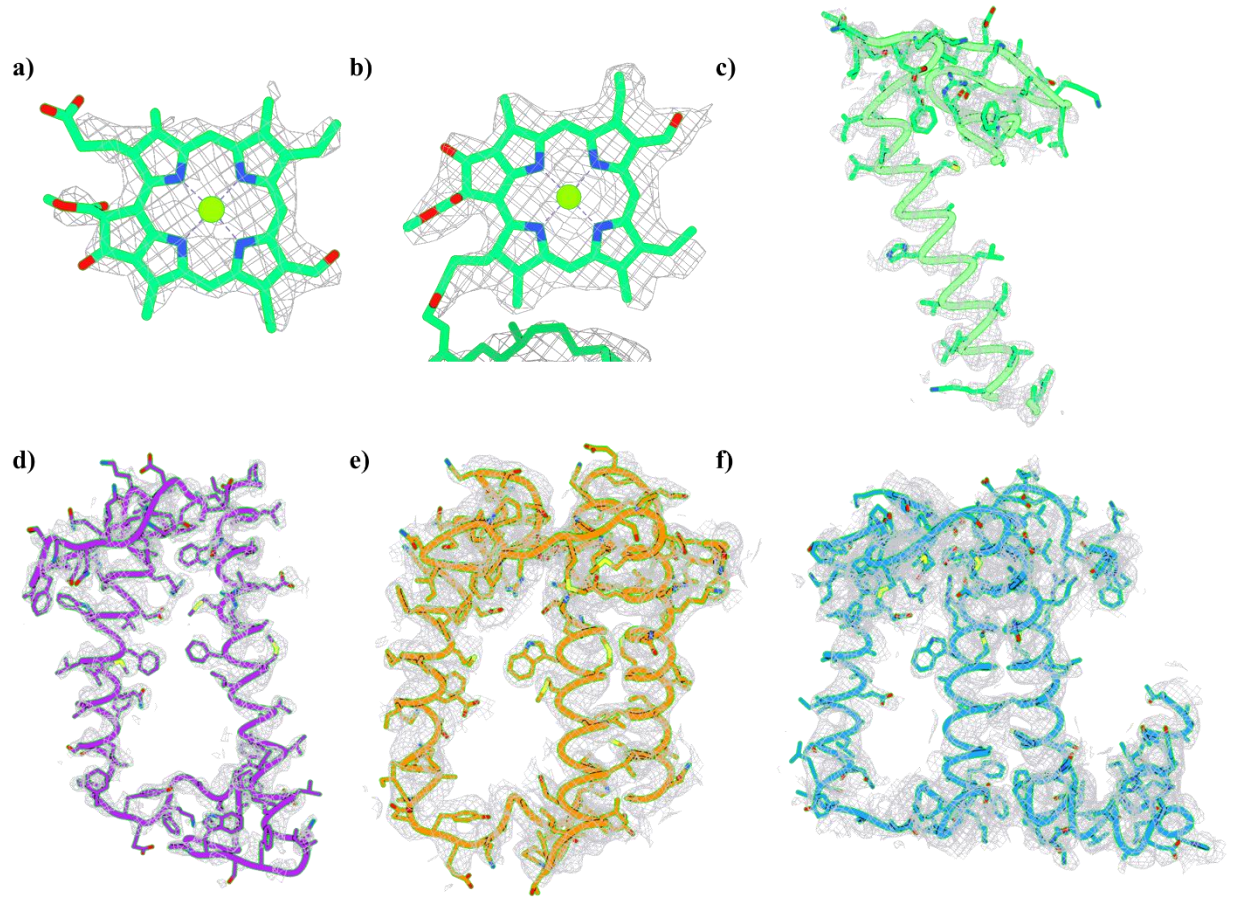

45  
46

47 **Supplementary Figure 4.** Map densities of TSP4 PSI. a) Lhca1' chlorophyll b 613 with the cryo-EM  
48 map at  $3.5\sigma$  contour. b) Lhca8 chlorophyll b 613 with the cryo-EM map at  $3.5\sigma$  contour. c) PsaK loop and  
49 second helix, residues 48-112, with with the cryo-EM map at  $3\sigma$  contour. d) Lhca4 loop and two helices,  
50 residues 90-190, with with the cryo-EM map at  $3\sigma$  contour. e) Lhca9 loop and three helices, residues 49-  
51 176, with with the cryo-EM map at  $3\sigma$  contour. f) Lhca2 loop and three helices, residues 49-210, with  
52 with the cryo-EM map at  $3\sigma$  contour.

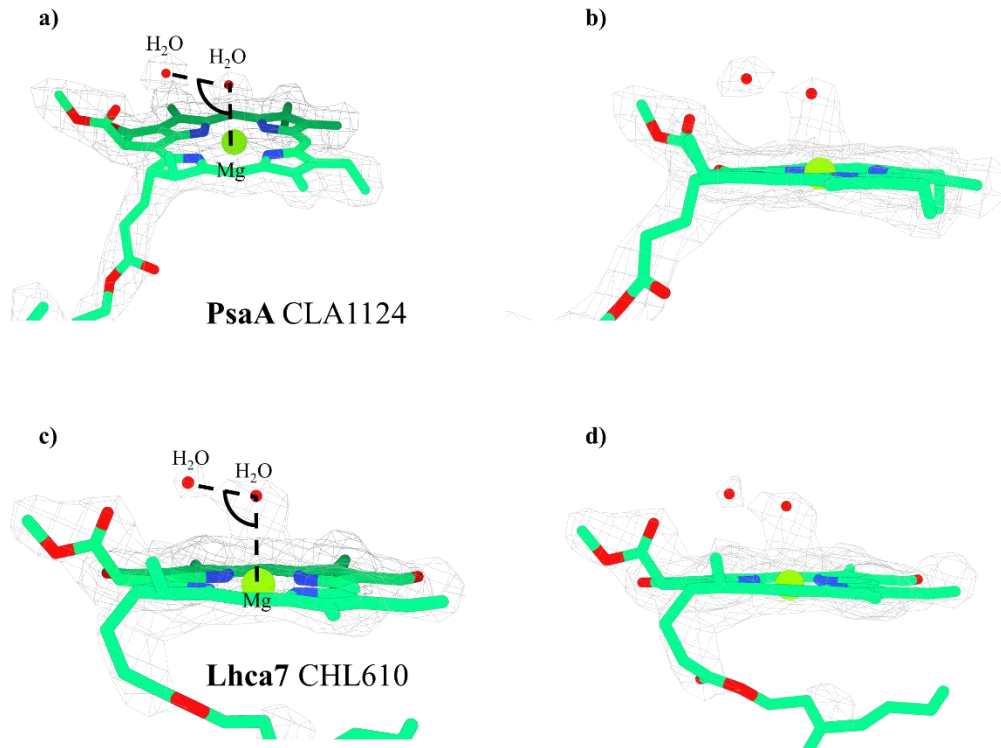

53  
54  
55  
56  
57  
58  
59  
60  
61  
62  
63  
64  
65  
66  
67  
68  
69  
70  
71  
72  
73  
74  
75  
76  
77  
78  
79

**Supplementary Figure 5.** The H<sub>2</sub>O-H<sub>2</sub>O-Mg chlorophyll coordination in TSP4 PSI. a) PsaA chlorophyll a 1124 coordinated by two water molecules, the dashed line shows the L shape formed. b) Porphyrin plane image of chlorophyll a, with the cryo-EM map at 4σ contour surrounding the chlorophyll showing the water molecule density. c) Lhca7 chlorophyll b 610 coordinated by two water molecules, the dashed line shows the L shape formed. d) Porphyrin plane image of chlorophyll b, with the cryo-EM map at 4σ contour surrounding the chlorophyll showing the water molecule density. The carbons are coloured spring-green, the nitrogens in blue, the oxygens in red, and magnesium as bright-green spheres.

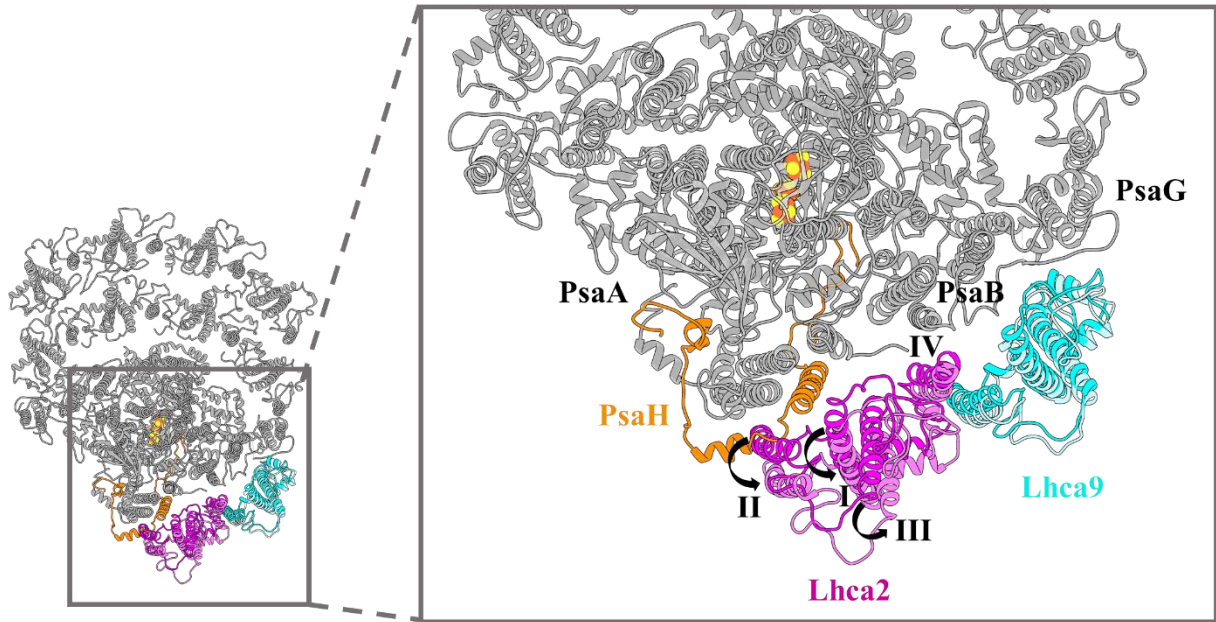

80  
81  
82  
83  
84  
85  
86  
87  
88

**Supplementary Figure 6.** Lhca2-9 movement caused by the PsaH insertion in *C. reinhardtii* PSI-LHCI-LHCII. A zoom-in on the Lhca2-Lhca9 dimer of TSP4 and in *C. reinhardtii* PSI-LHCI-LHCII<sup>26</sup> (PDBID 7D0J). The insertion of PsaH caused Lhca2 helices I, II, and III to move away from PsaB, while Lhca9 also moved but to a lesser extent. PsaH is coloured orange, TSP4 Lhca2 in magenta, 7D0J Lhca2 in pink, TSP4 Lhca9 in cyan, and 7D0J in light-blue, with the remaining PSI subunits in grey.

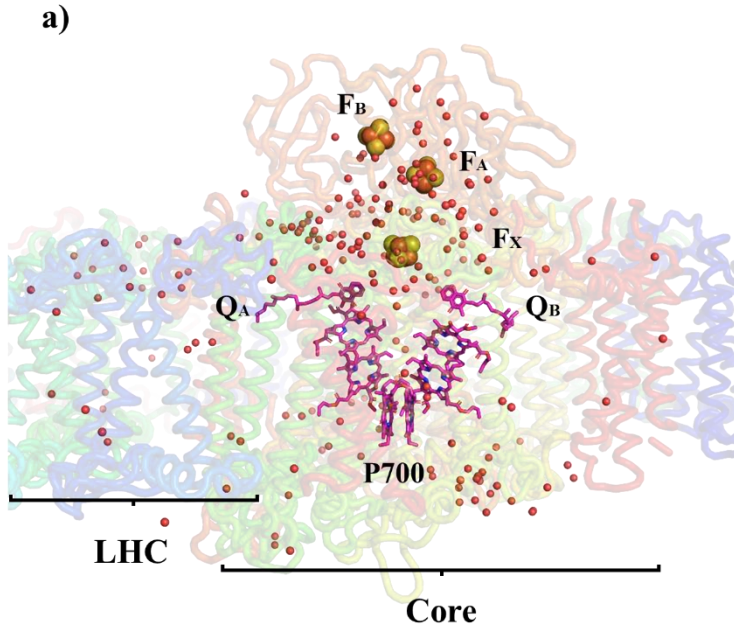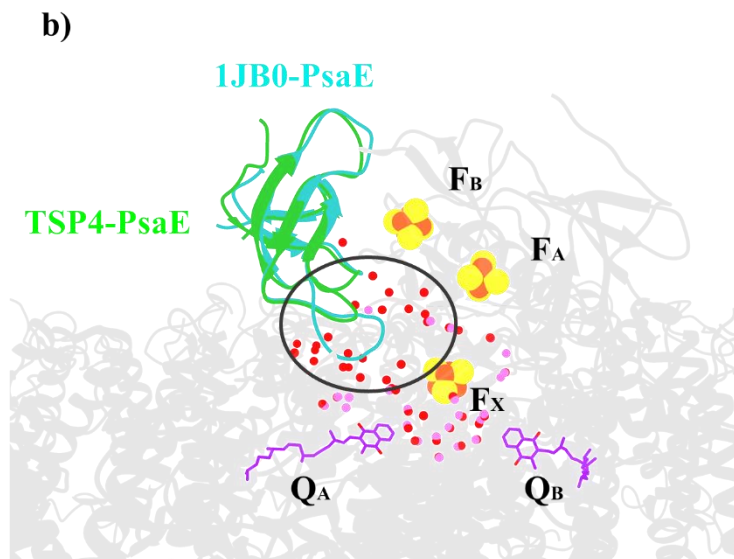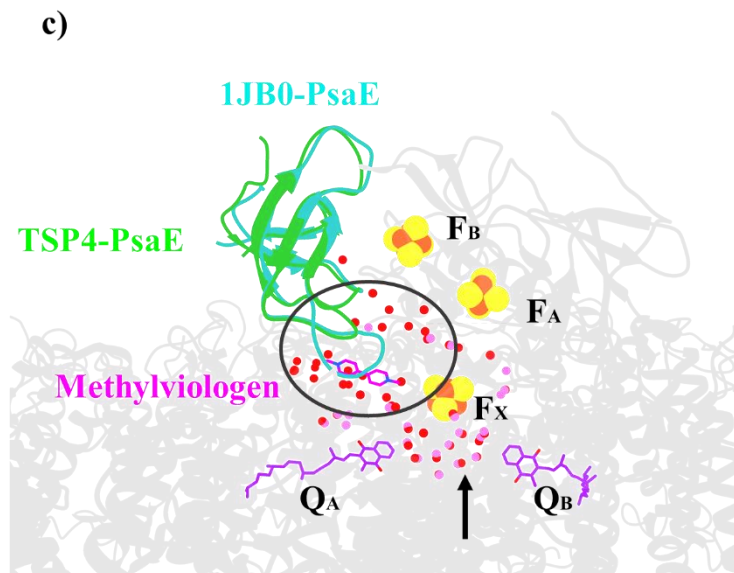



90  
91 **Supplementary Figure 7.** Water common to the plant and the TSP4 PSI structures, and the effect of the  
92 PsaE loop on the water distribution in cyanobacteria and *C. reinhardtii*. a) The conserved water molecules  
93 between TSP4-10LHC and the plant PSI<sup>24</sup> (PDBID 5L8R). The largest clusters are found near the ETC  
94 and in the LHCs. The ETC components are coloured purple, the iron-sulphur clusters in yellow-brown,  
95 and the water molecules as red spheres. b) Superposition of TSP4 and *Thermosynechococcus elongatus*  
96 PSI<sup>21</sup> (PDBID 1JB0) when comparing PsaE and the water molecules close to FX, FA, FB, and the  
97 quinones. The extended PsaE loop of 1JB0 and the cavity filled with water molecules and its absence in  
98 TSP4 are encircled. The TSP4 water molecules are coloured red, the 1JB0 water molecules are coloured  
99 orchid, TSP4 PsaE is coloured green, 1JB0 PsaE in cyan, and the quinones in purple. c) The proposed  
100 methyl viologen binding site is the same cavity as encircled in (b), adjacent to FX. The 1JB0 extended  
101 PsaE loop prevents methyl viologen access to FX. Black arrow shows the water pentamer structure near  
102 Q<sub>B</sub>.  
103  
104

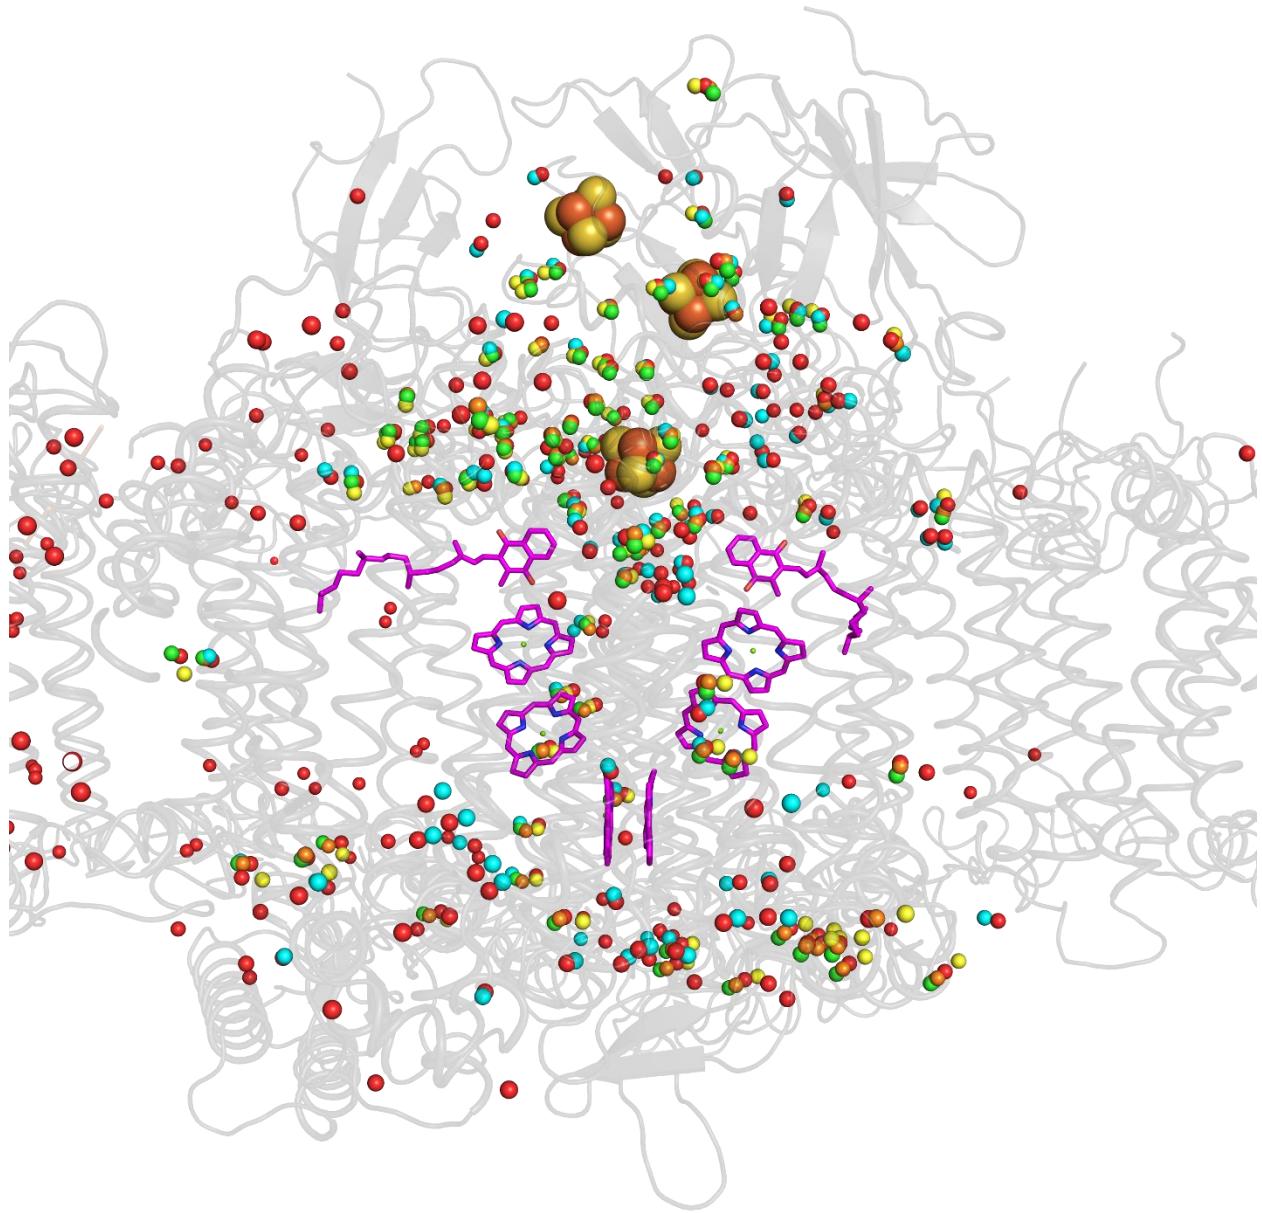

105  
106  
107  
108  
109  
110  
111  
112  
113

**Supplementary Figure 8.** The common water in PSI of TSP4, plant PSI-Fd, *Chlorella ohadii*, *Dunaliella salina* and *Thermosynechococcus elongatus*. Water molecules from each organism are shown as spheres. TSP4 water are colored red, plant PSI-Fd in green, *D. salina* in orange, *C. ohadii* in yellow and *T. elongatus* in cyan. PSI polypeptide is shown as a grey cartoon, ETC components are shown as magenta sticks and iron-sulphur clusters as yellow-brown spheres.

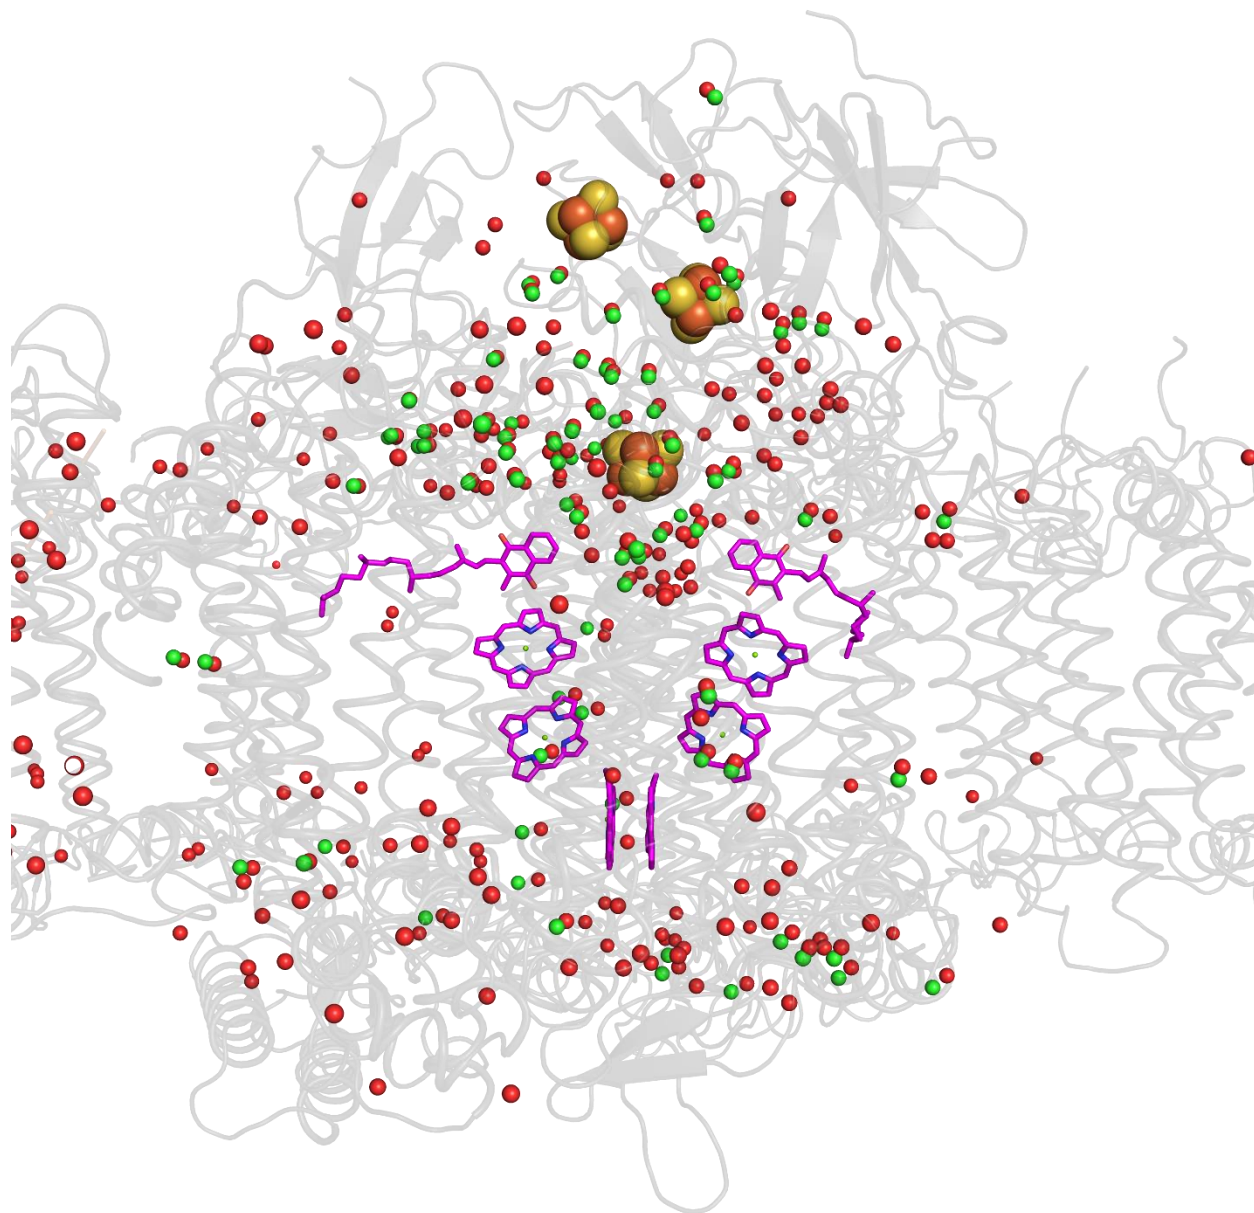

114  
115

116 **Supplementary Figure 9.** The common water of TSP4 and plant PSI-Fd. TSP4-10LHC water  
117 molecules are shown as red spheres and PSI-Fd<sup>42</sup> (PDBID 6YAC) water molecules are shown as green  
118 spheres. PSI polypeptides and ETC components are coloured as in Supplementary Figure 8.

119  
120

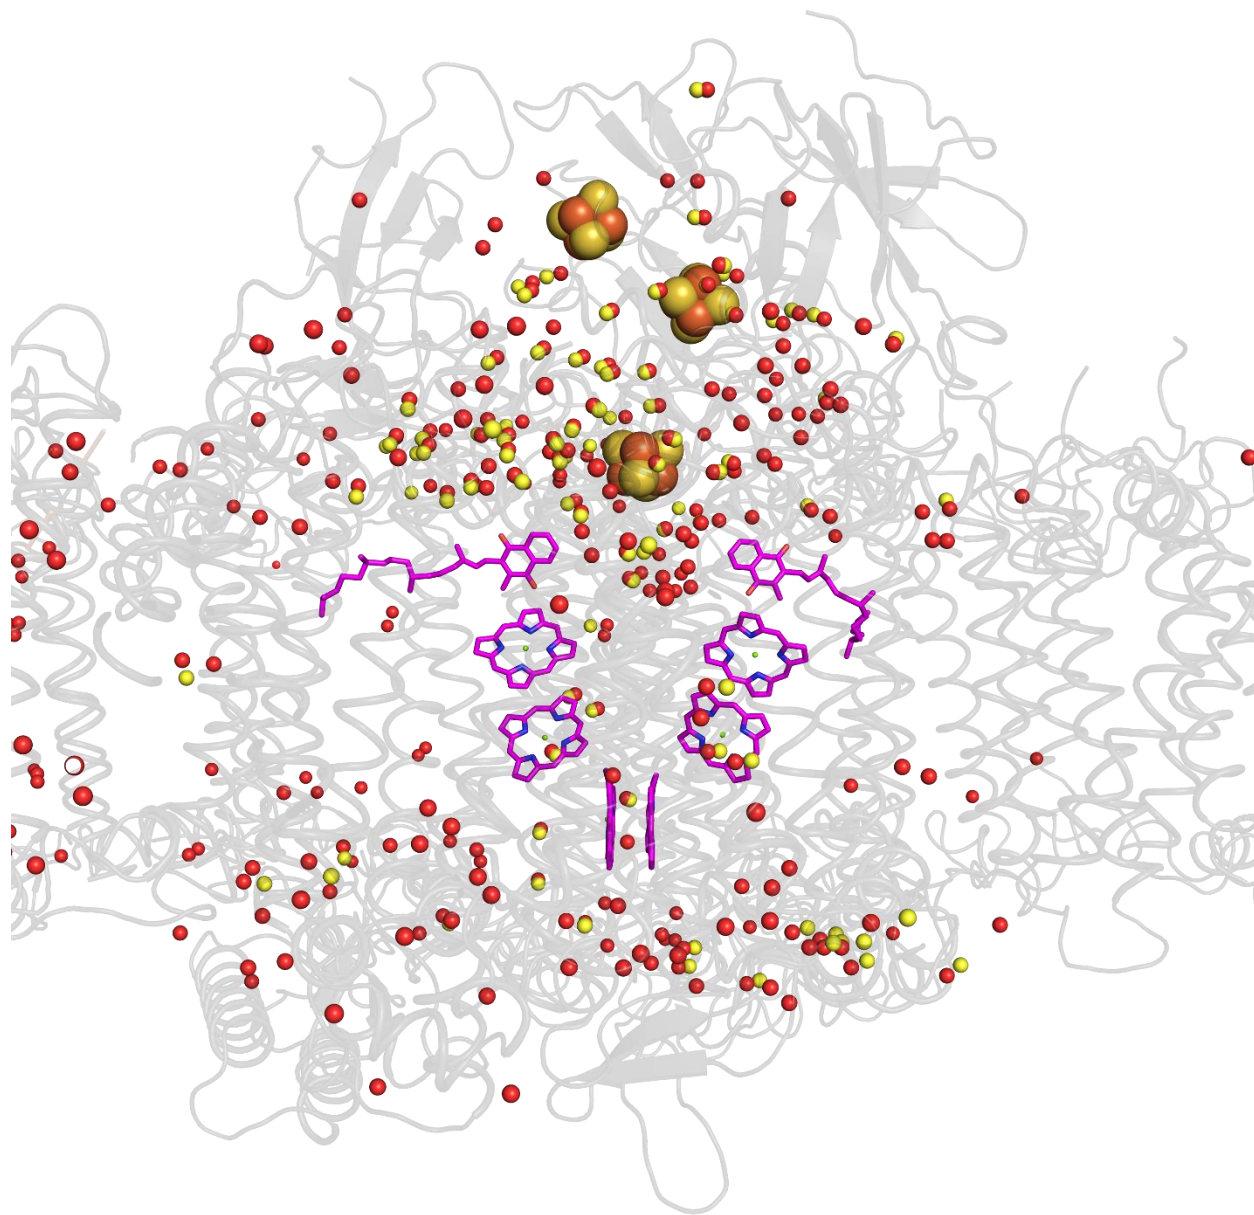

121  
122  
123  
124  
125  
126  
127  
128  
129

**Supplementary Figure 10.** The common water of TSP4 and *Chlorella ohadii* PSI. TSP4-10LHC water molecules are shown as red spheres and *C. ohadii* PSI (PDBID 6ZZX; Caspy et al., accepted for publication) are shown as yellow spheres. PSI polypeptides and ETC components are coloured as in Supplementary Figure 8.

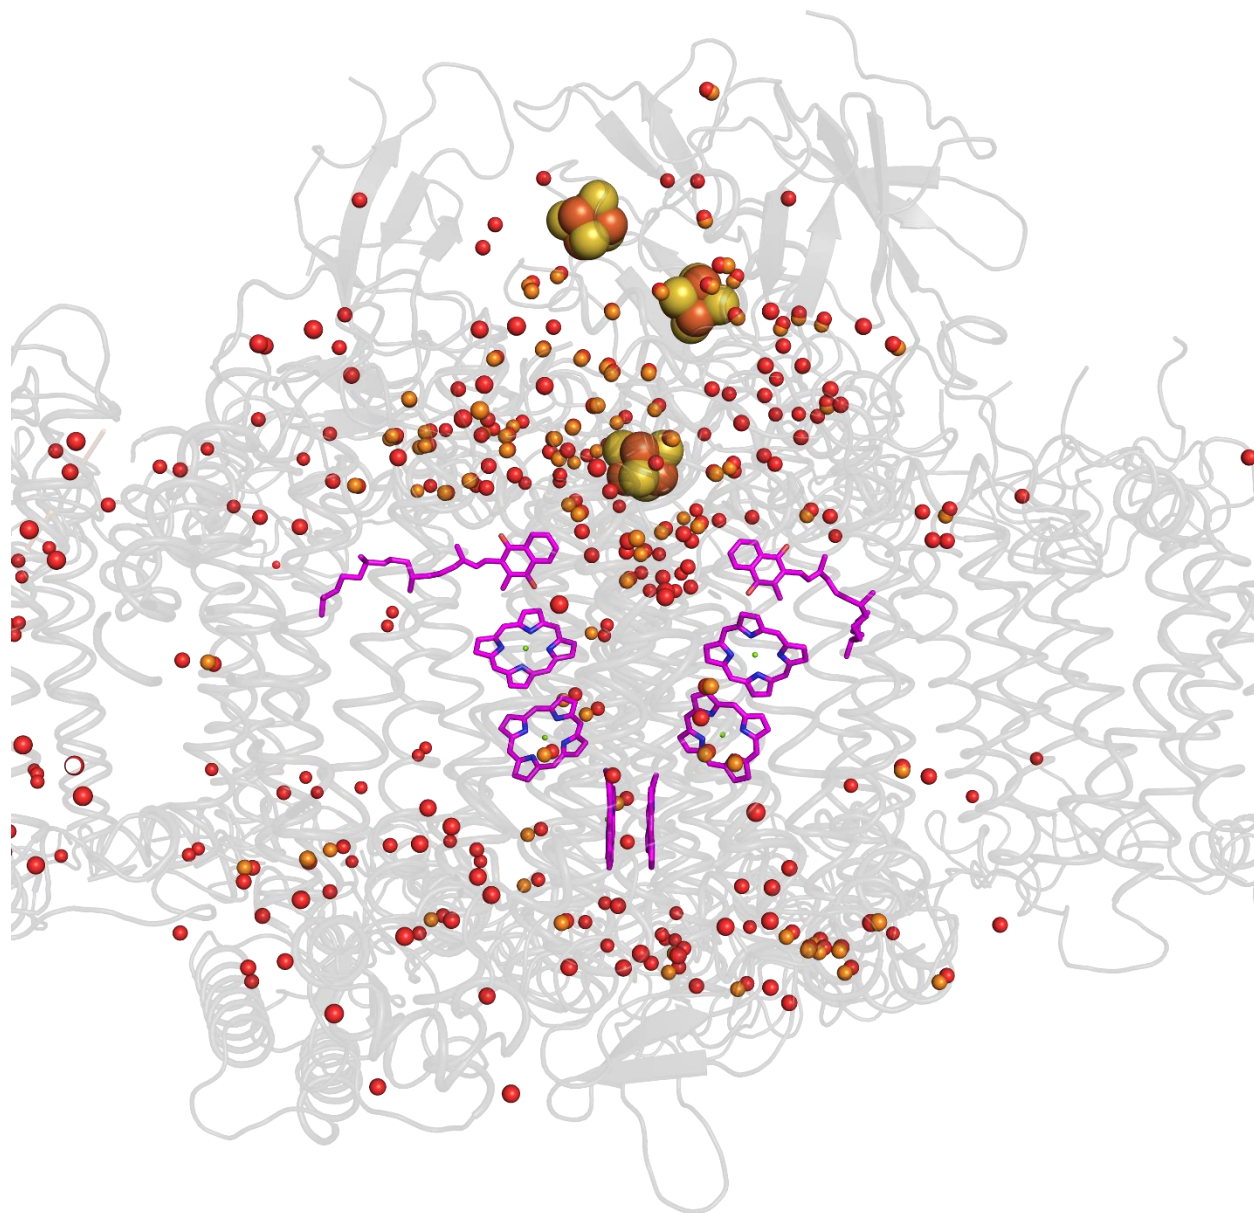

130  
131  
132  
133  
134  
135  
136  
137

**Supplementary Figure 11.** The common water of TSP4 and *Dunaliella salina* PSI. TSP4-10LHC water molecules are shown as red spheres and *D. salina* PSI<sup>25</sup> (PDBID 6SL5) are shown as orange spheres. PSI polypeptides and ETC components are coloured as in Supplementary Figure 8.

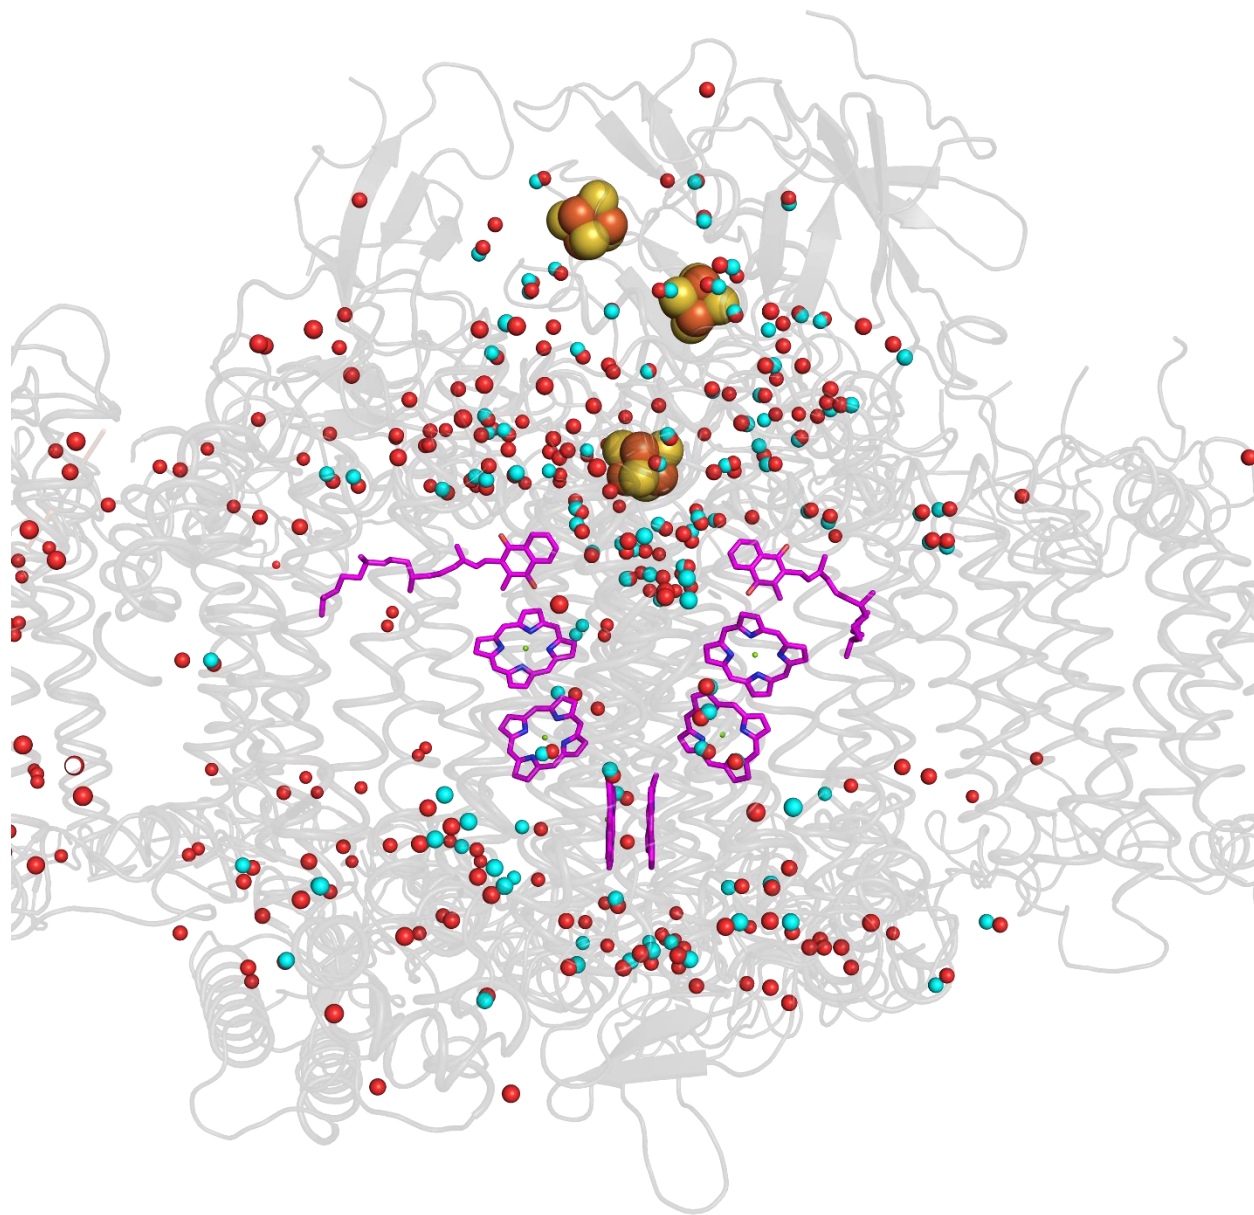

138  
139  
140  
141  
142  
143  
144  
145

**Supplementary Figure 12.** The common water of TSP4 and *Synechocystis* 6803 PSI. TSP4-10LHC water molecules are shown as red spheres and *Synechocystis* PSI<sup>28</sup> (PDBID 5OY0) are shown as cyan spheres. PSI polypeptides and ETC components are coloured as in Supplementary Figure 8.

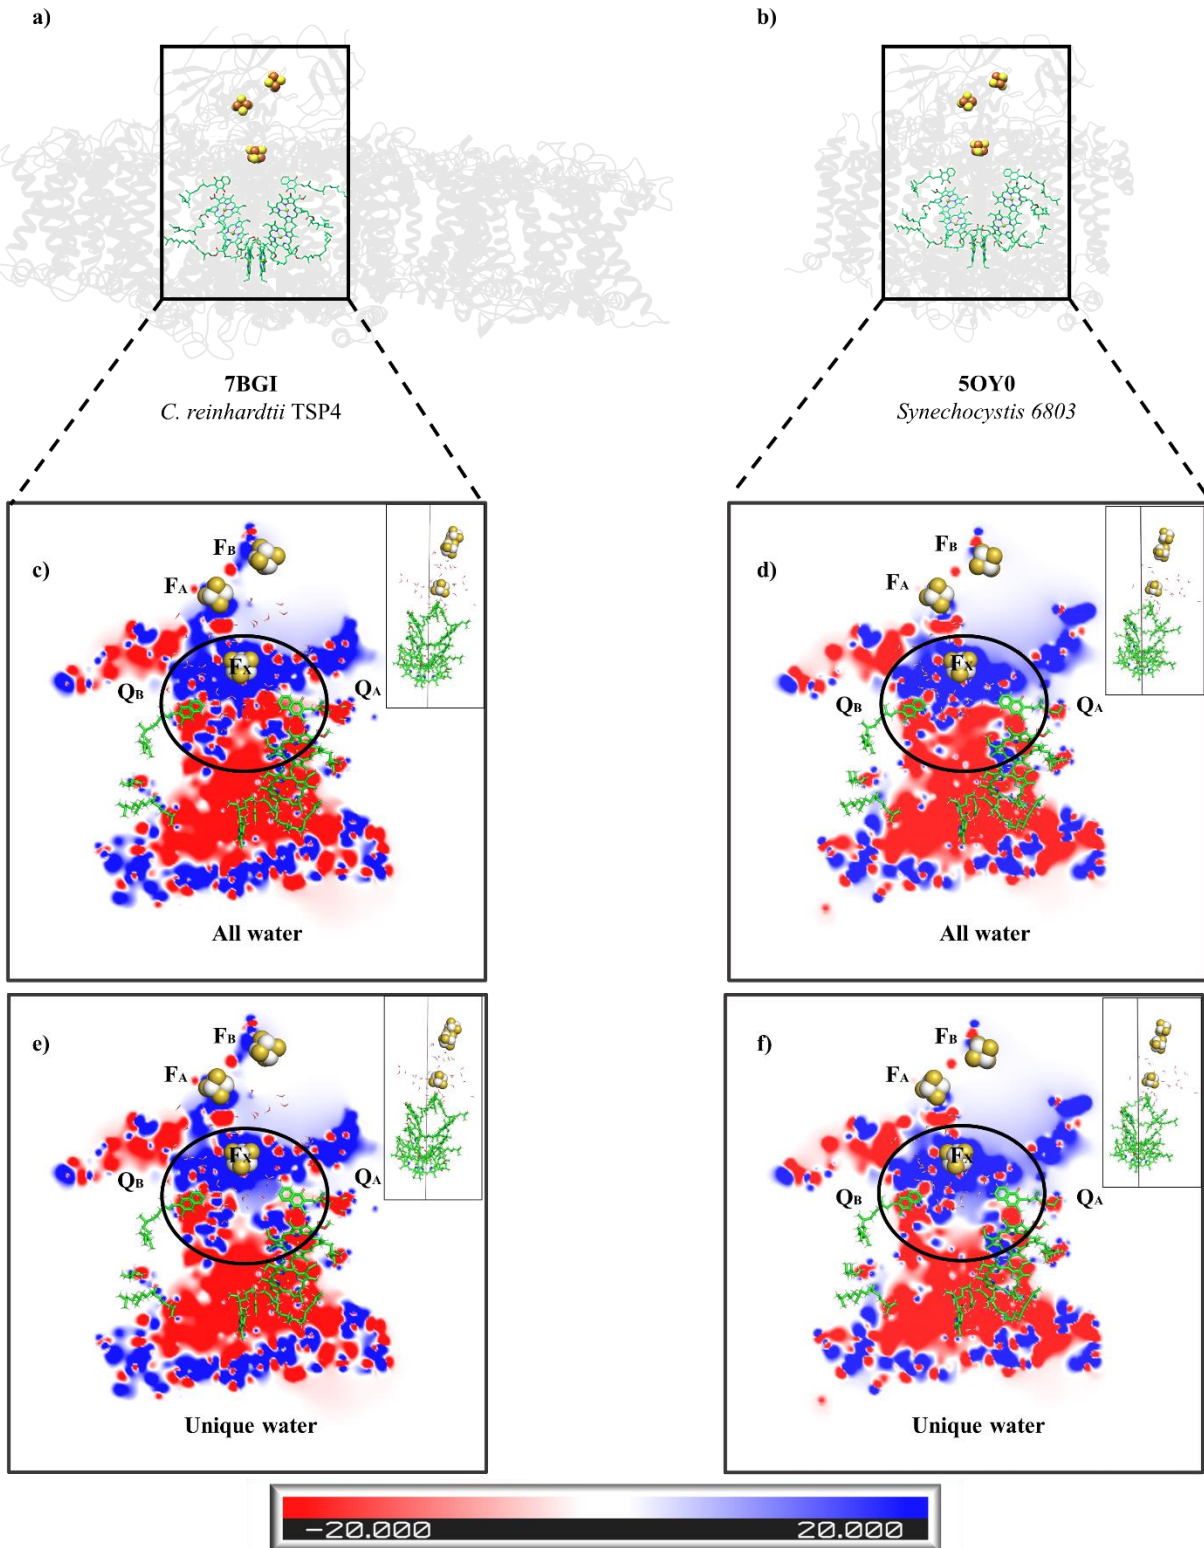

146  
147

148 **Supplementary Figure 13.** The electrostatic potentials of the *C. reinhardtii* TSP4 and *Synechocystis*  
149 PSI RC central slice. The structure of *C. reinhardtii* TSP4 (a) and *Synechocystis* PSI (b). For clarity, only  
150 the ligands of the proteins (chlorophylls, quinones, and the iron-sulphur clusters) and the water molecules

151 are presented and are marked with a rectangle. The electrostatic potentials were calculated on two  
152 conditions: with all of the water molecules found within a  $10 \text{ \AA}$  radius of FX of *C. reinhardtii* TSP4 (c),  
153 or *Synechocystis* (d), or the water molecules that constitute a unique subset to *C. reinhardtii* TSP4 (e), or  
154 *Synechocystis* (f). The negative potentials ( $0 k_B T/e > \Phi > -20 k_B T/e$ ) are coloured red, the positive  
155 potentials ( $0 k_B T/e < \Phi < 20 k_B T/e$ ) are blue, and the neutral potentials are white (see the colour code at  
156 the bottom). The slide location is shown in the small images of the panels, c-through-f. Noticeable  
157 changes in the electrostatic potential appear in the region between the quinones and FX, marked by black  
158 circles.  
159



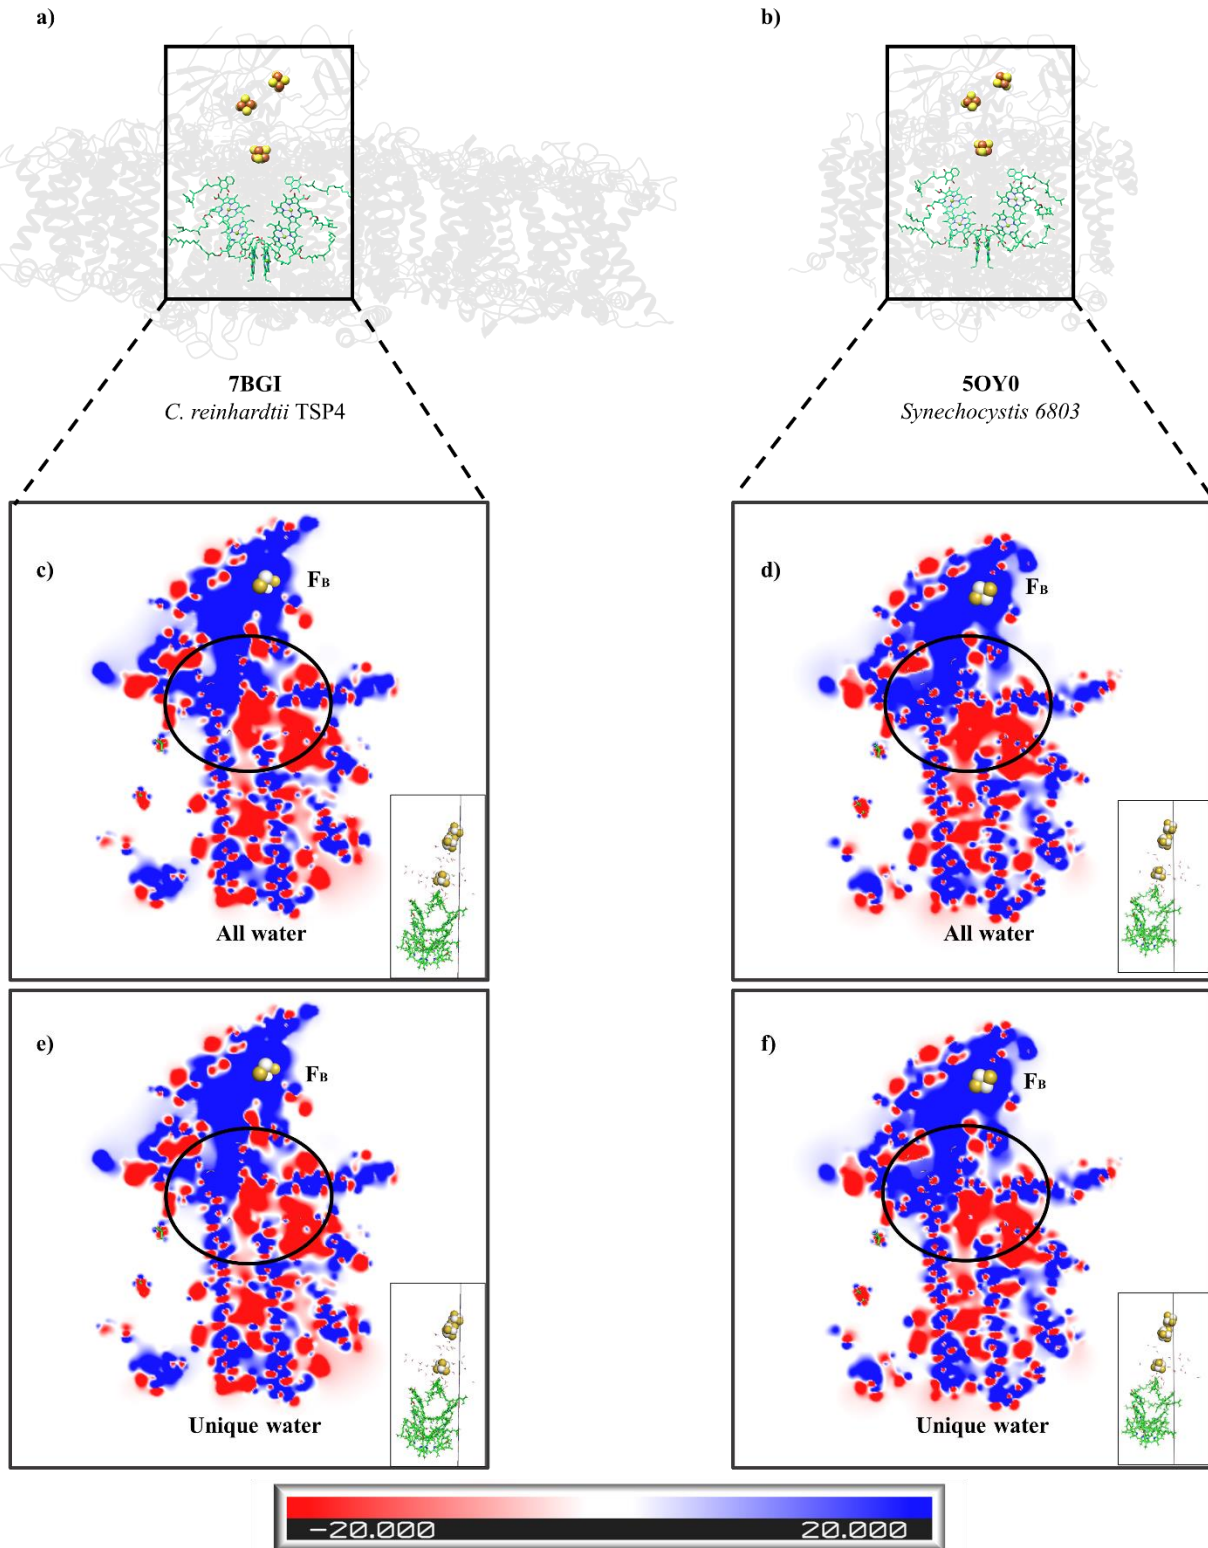

160  
161  
162  
163  
164

**Supplementary Figure 14.** The electrostatic potentials of the *C. reinhardtii* TSP4 and *Synechocystis* PSI RC forward slice. The structure of *C. reinhardtii* TSP4 (a) and *Synechocystis* PSI (b). For clarity, only the ligands of the proteins (chlorophylls, quinones, and the iron-sulphur clusters) and the water

165 molecules are presented and are marked with a rectangle. The electrostatic potentials were calculated on  
166 two conditions: with all of the water molecules found within a 10 Å radius of FX of *C. reinhardtii* TSP4  
167 (c), or *Synechocystis* (d), or the water molecules that constitute a unique subset to *C. reinhardtii* TSP4 (e),  
168 or *Synechocystis* (f). The negative potentials ( $0 k_B T/e > \Phi > -20 k_B T/e$ ) are coloured red, the positive  
169 potentials ( $0 k_B T/e < \Phi < 20 k_B T/e$ ) are blue, and the neutral potentials are white (see the colour code at  
170 the bottom). The slide location is shown in the small images of the panels, c-through-f. The electrostatic  
171 potential is similar in this slice, which is nearly devoid of water molecules, marked by black circles.  
172

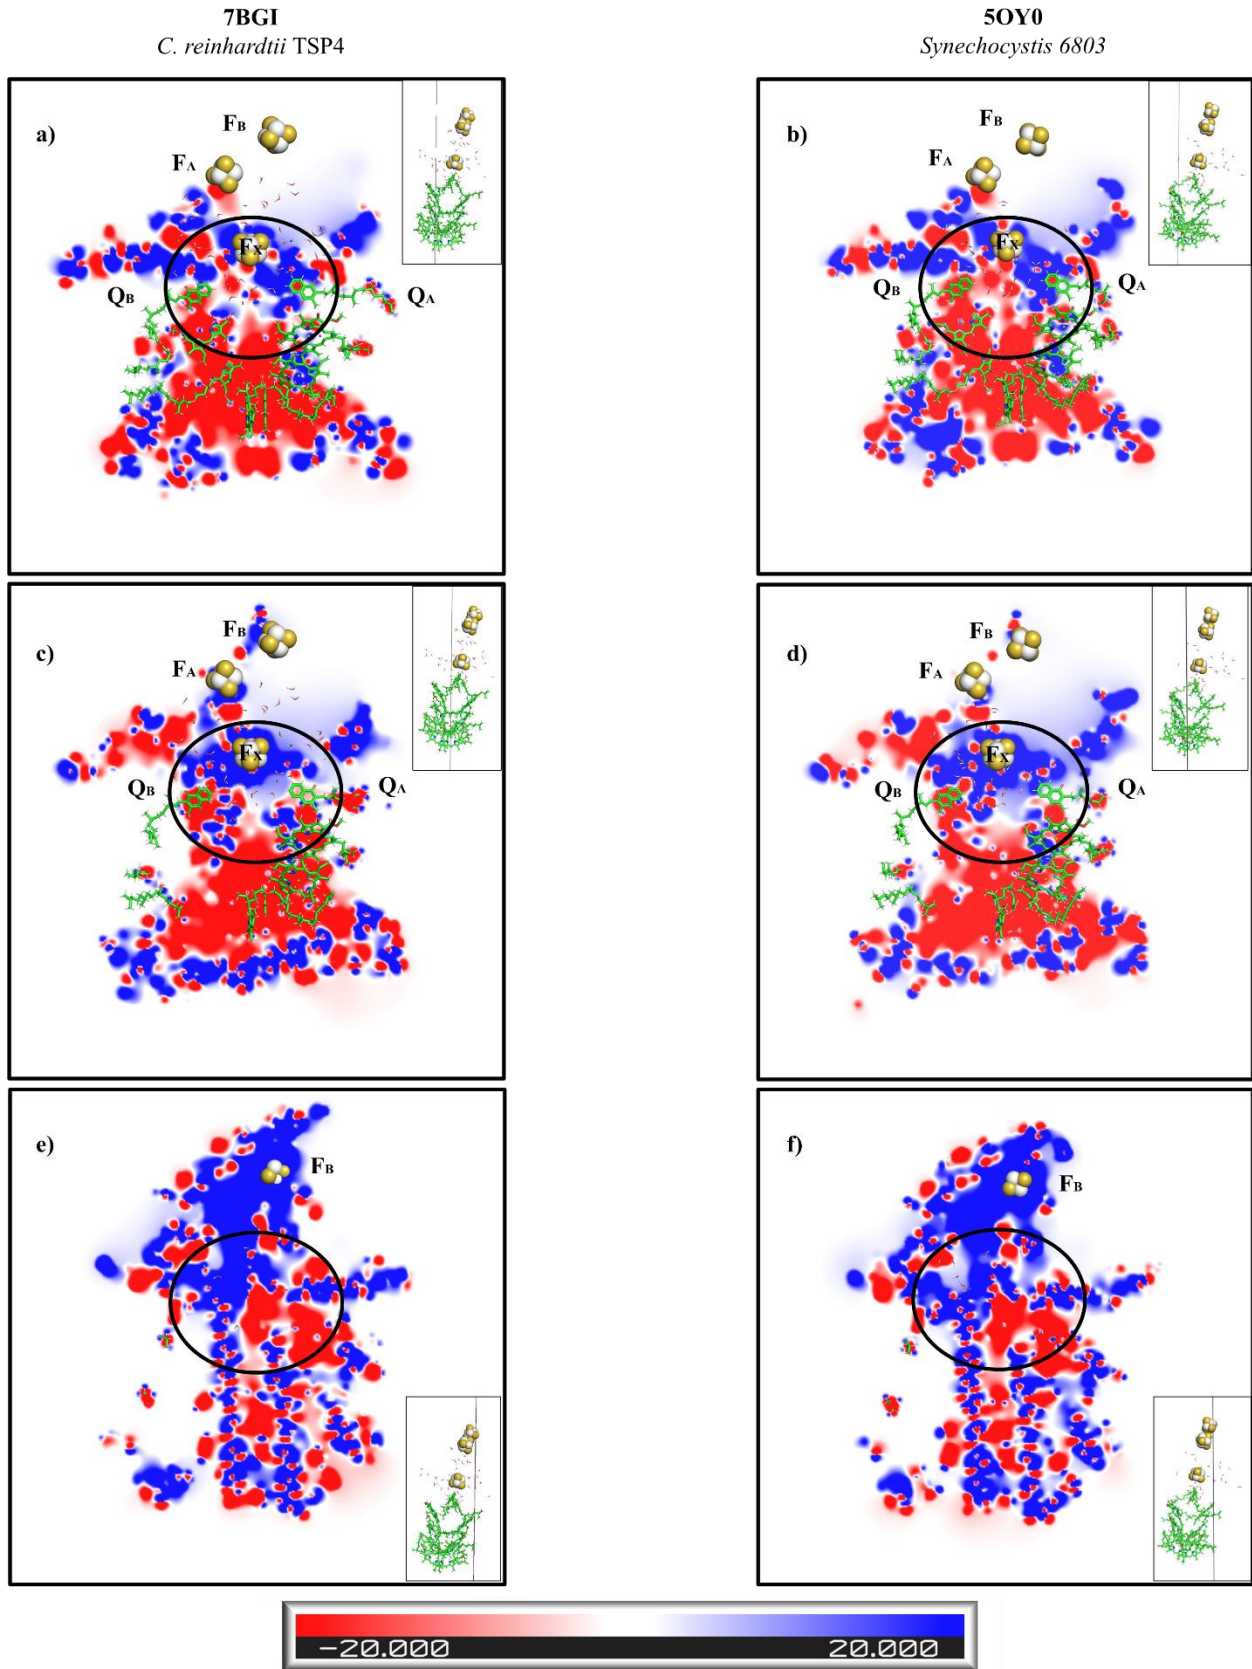

174

175 **Supplementary Figure 15.** The electrostatic potentials of the *C. reinhardtii* TSP4 and *Synechocystis*  
176 PSI RC, excluding all of the water molecules. The backward slice of *C. reinhardtii* TSP4 (a) and  
177 *Synechocystis* PSI (b), the middle slice of *C. reinhardtii* TSP4 (c), or *Synechocystis* (d), or the forward  
178 slice of *C. reinhardtii* TSP4 (e), or *Synechocystis* (f.). The negative potentials ( $0 k_B T/e > \Phi > -20 k_B T/e$ )  
179 are coloured red, the positive potentials ( $0 k_B T/e < \Phi < 20 k_B T/e$ ) are blue, and the neutral potentials are  
180 white (see the colour code at the bottom). The slide location is shown in the small images of the panels, a-  
181 through-f. Removing all of the water molecules results in a similar electrostatic potential in all three  
182 views, marked by black circles, compared to the calculated potential shown in Fig.4 and Supplementary  
183 Figure 13-14.

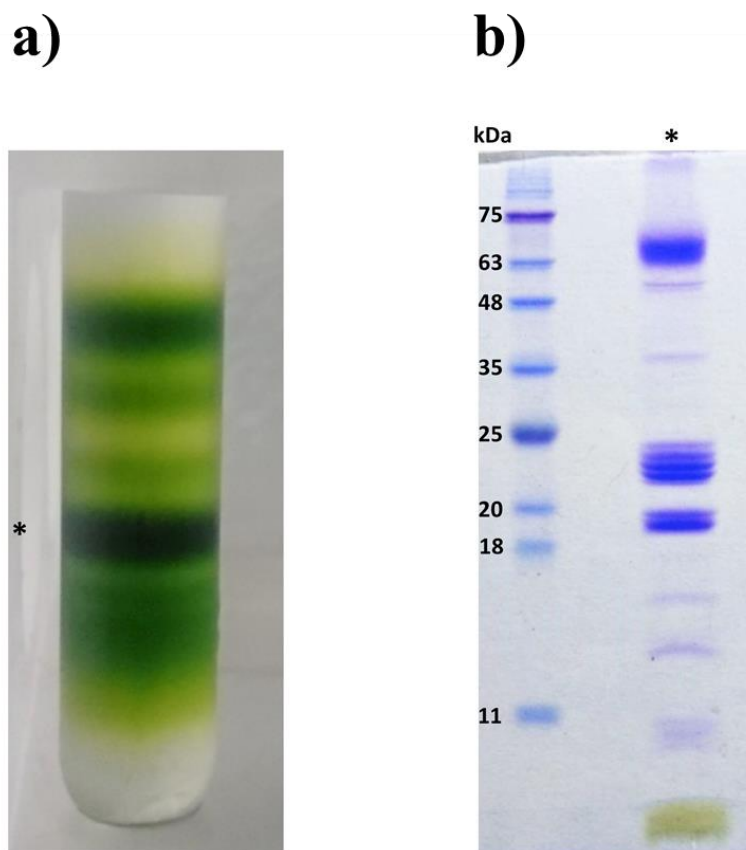

184  
185 **Supplementary Figure 16.** TSP4-PSI purification. a) TSP4 sucrose gradient, the retained band is  
186 marked with an asterisk. b) SDS-PAGE analysis of the sample that was used for the cryo-EM preparation.  
187

188 **Supplementary Table. 1.** Water coordination of TSP4 chlorophylls and their respective H<sub>2</sub>O-H<sub>2</sub>O-  
 189 Magnesium angles.  
 190

| Chain | Number | H <sub>2</sub> O-H <sub>2</sub> O-MG angle (°) | Chlorophyll type |
|-------|--------|------------------------------------------------|------------------|
| PsaA  | 1119   | 99                                             | a                |
| PsaA  | 1124   | 103                                            | a                |
| PsaA  | 1140   | 103                                            | a                |
| PsaB  | 1216   | 101                                            | a                |
| PsaB  | 1221   | 102                                            | a                |
| PsaB  | 1222   | 113                                            | a                |
| PsaB  | 1232   | 126                                            | a                |
| PsaB  | 1237   | 99                                             | a                |
| PsaB  | 1238   | 98                                             | a                |
| PsaF  | 1302   | 113                                            | a                |
| PsaL  | 1503   | 127                                            | a                |
| Lhca1 | 606    | 120                                            | a                |
| Lhca1 | 611    | 119                                            | a                |
| Lhca1 | 613    | 103                                            | a                |
| LhcaZ | 610    | 110                                            | b                |
| LhcaZ | 611    | 106                                            | a                |
| Lhca3 | 606    | 129                                            | a                |
| Lhca3 | 611    | 105                                            | b                |
| Lhca3 | 613    | 92                                             | a                |
| Lhca7 | 606    | 130                                            | a                |
| Lhca7 | 610    | 101                                            | b                |
| Lhca7 | 611    | 114                                            | a                |
| Lhca7 | 613    | 106                                            | a                |
| Lhca8 | 610    | 99                                             | b                |
| Lhca8 | 611    | 116                                            | a                |
| Lhca8 | 613    | 91                                             | b                |
| Lhca4 | 611    | 110                                            | b                |
| Lhca5 | 606    | 141                                            | a                |
| Lhca5 | 613    | 92                                             | a                |
| Lhca5 | 622    | 106                                            | a                |
| Lhca6 | 603    | 106                                            | a                |
| Lhca6 | 610    | 103                                            | b                |
| Lhca6 | 611    | 100                                            | b                |

191  
 192
